# Supplementary material for: Chemical stabilization strategy for cymoxanil: synthesis and characterization of cocrystals with small organic acids
Source: Royal Society of Chemistry journal article supplement (doi:10.1039/d4ce00513a), 2024-01-01
Supplement: d4ce00513a1.pdf [file d4ce00513a1.pdf]

*Supporting Information*

**Chemical Stabilization Strategy for  
Cymoxanil: Synthesis and  
Characterization of Cocrystals with  
Small Organic Acids**

*Mingzhu Yang<sup>a</sup>, Zhouyu Jiang<sup>a</sup>, Cunbin Du<sup>b</sup>, Xiaowen Zhang<sup>a</sup>, Mingliang Wang<sup>a\*</sup>*

<sup>a</sup> School of Chemistry and Chemical Engineering, Southeast University, Nanjing  
211189, PR China

<sup>b</sup> School of Pharmaceutical and Materials Engineering, Taizhou University, Taizhou,  
318000, PR China

Corresponding author email: wangmlchem@seu.edu.cn

## CONTENTS

**Fig. S1** The types of coformers used in screening experiments.

**Table S1** Overview of screening experiments.

**Fig. S2** Typical HPLC chromatograms of CX, CX-SA cocrystal and CX-SCA cocrystal.

**Fig. S3** Standard curve of CX content (concentration-peak area) determined by HPLC.

**Fig. S4** DSC curves of the raw materials and cocrystals. (a) DSC curves of the CX-SA cocrystal compared to CX and SA. (b) DSC curves of the CX-SCA cocrystal compared with CX and SCA.

**Fig. S5** TGA curves of the raw materials and cocrystals. (a) TGA curves of the CXSA cocrystal compared to CX and SA. (b) TGA curves of the CX-SCA cocrystal compared with CX and SCA.

**Table S2** Hydrogen bonds of CX-SA and CX-SCA cocrystals.

**Table S3** Residual percentages of CX content in stability experiments.

**Fig. S6** (a) PXRD patterns of CX and two cocrystals before and after solubility test. (b) PXRD patterns of CX and two cocrystals before and after dissolution test. **Fig. S7** Detailed two-dimensional fingerprint plots (a) CX. (b) CX-SA cocrystal. (c) CX-SCA cocrystal.

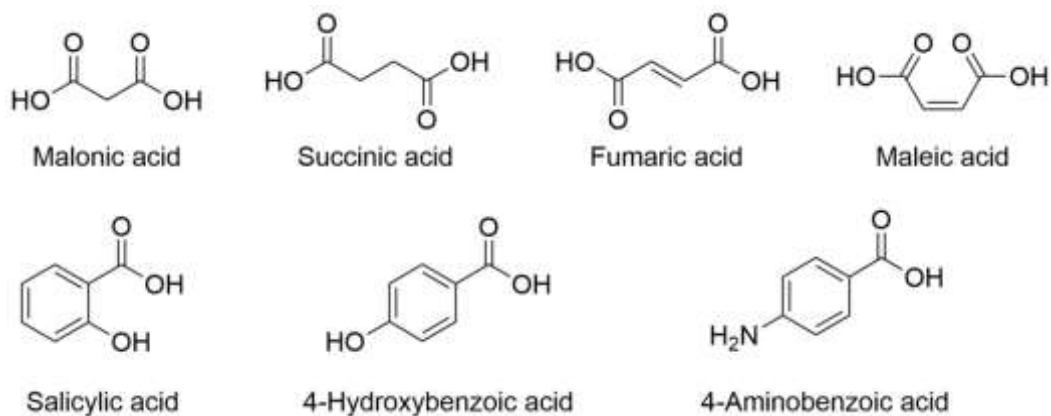

**Fig. S1** The types of coformers used in screening experiments.

**Table S1** Overview of screening experiments.

| API       | Coformer              | Result |
|-----------|-----------------------|--------|
| Cymoxanil | Malonic acid          | ×      |
| Cymoxanil | Succinic acid         | √√     |
| Cymoxanil | Fumaric acid          | √      |
| Cymoxanil | Maleic acid           | ×      |
| Cymoxanil | Salicylic acid        | √√     |
| Cymoxanil | 4-Hydroxybenzoic acid | ×      |
| Cymoxanil | 4-Aminobenzoic acid   | ×      |

□ represents a new potentially cocrystal determined by PXRD; □□ represents a new cocrystal determined by PXRD and its structure is determined by SCXRD; × represents no new cocrystal found by PXRD.

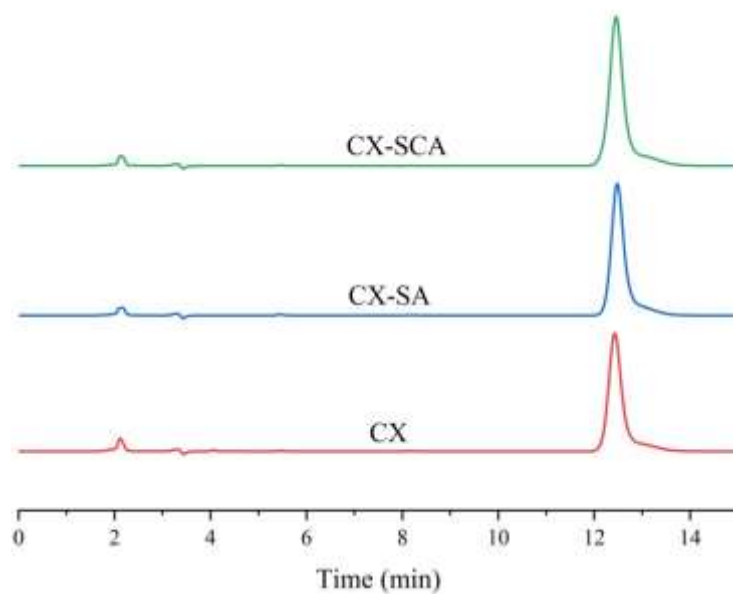

**Fig. S2** Typical HPLC chromatograms of CX, CX-SA cocrystal and CX-SCA cocrystal.

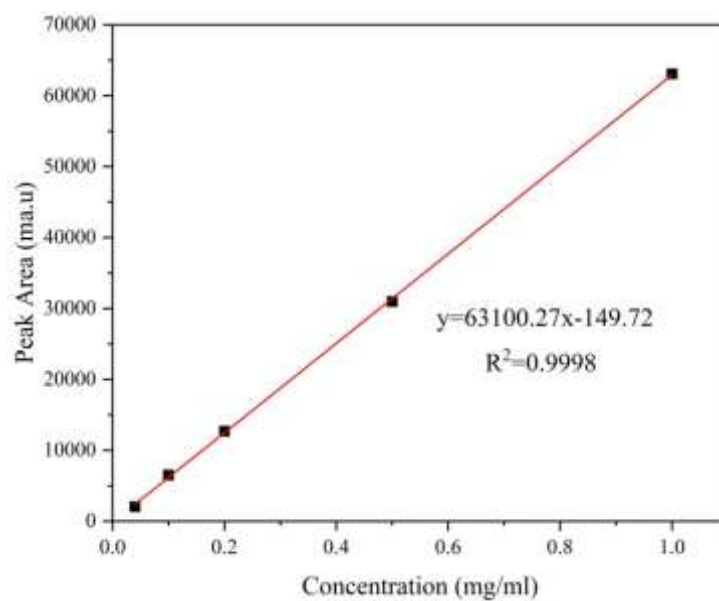

**Fig. S3** Standard curve of CX content (concentration-peak area) determined by HPLC.

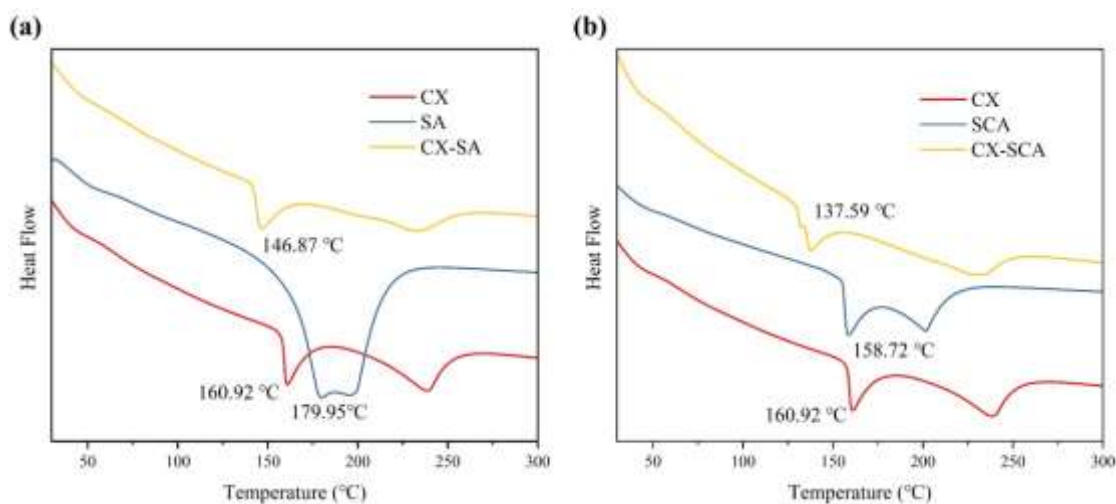

**Fig. S4** DSC curves of the raw materials and cocrystals. (a) DSC curves of the CX-SA cocrystal compared to CX and SA. (b) DSC curves of the CX-SCA cocrystal compared with CX and SCA.

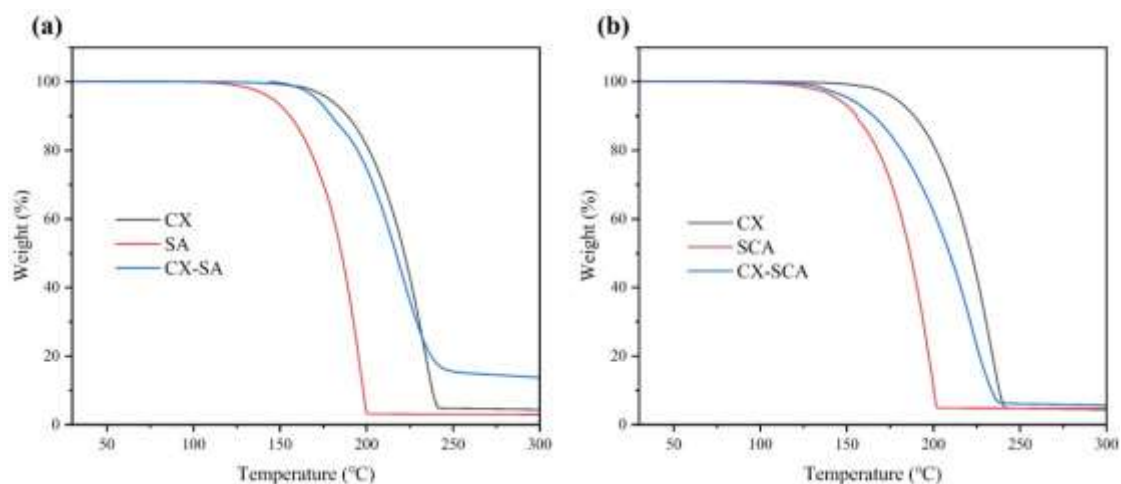

**Fig. S5** TGA curves of the raw materials and cocrystals. (a) TGA curves of the CXSA cocrystal compared to CX and SA. (b) TGA curves of the CX-SCA cocrystal compared with CX and SCA.

**Table S2** Hydrogen bonds of CX-SA and CX-SCA cocrystals

| D-H...A          | d(D...H)<br>(Å) | d(H...A)<br>(Å) | d(D...A)<br>(Å) | ∠D-H...A<br>(deg) | symmetry<br>code |
|------------------|-----------------|-----------------|-----------------|-------------------|------------------|
| CX-SA            |                 |                 |                 |                   |                  |
| N3-H3...O4       | 0.86            | 2.26            | 3.083(2)        | 160               | x, y, z          |
| Intra N3-H3...N1 | 0.86            | 2.35            | 2.715(3)        | 106               |                  |
| Intra N4-H4...O2 | 0.86            | 2.03            | 2.696(2)        | 134               |                  |
| O5-H5O...O3      | 0.82            | 1.80            | 2.616(2) CX-SCA | 173               | x, y, z          |
| N3-H3...O5       | 0.86            | 2.17            | 3.000(3)        | 163               | -1+x, y, z       |
| Intra N3-H3...N1 | 0.86            | 2.36            | 2.738(3)        | 107               |                  |
| Intra N4-H4...O2 | 0.86            | 2.02            | 2.677(4)        | 132               |                  |
| N4-H4...N2       | 0.86            | 2.60            | 3.321(5)        | 142               | 3-x,1-y,1-z      |
| O4-H4A...O3      | 0.82            | 1.75            | 2.561(4)        | 172               | -1+x, y, z       |
| Intra O6-H6...O5 | 0.82            | 1.87            | 2.590(3)        | 145               |                  |

**Table S3** Residual percentages of CX content in stability experiments.

|            | Sample | 1     | 2     | 3     | Average | Error |
|------------|--------|-------|-------|-------|---------|-------|
| pH=5.8     | CX     | 72.91 | 72.31 | 72.32 | 72.51   | 0.34  |
|            | CX-SA  | 77.85 | 81.47 | 89.21 | 82.84   | 5.80  |
|            | CX+SA  | 88.50 | 92.43 | 90.72 | 90.55   | 1.97  |
|            | CX-SCA | 96.69 | 92.51 | 90.61 | 93.27   | 3.11  |
|            | CX+SCA | 92.11 | 96.45 | 91.82 | 93.46   | 2.59  |
| Pure water | CX     | 62.85 | 58.13 | 53.51 | 58.16   | 4.67  |
|            | CX-SA  | 79.56 | 88.95 | 89.61 | 86.04   | 5.62  |
|            | CX+SA  | 85.58 | 92.59 | 90.67 | 89.61   | 3.62  |
|            | CX-SCA | 91.75 | 93.86 | 89.24 | 91.62   | 2.32  |
|            | CX+SCA | 91.30 | 94.73 | 91.10 | 92.38   | 2.04  |
| pH=8.0     | CX     | 0.60  | 0.49  | 0.45  | 0.51    | 0.08  |
|            | CX-SA  | 88.69 | 90.06 | 89.57 | 89.44   | 0.69  |
|            | CX+SA  | 89.69 | 88.09 | 89.93 | 89.24   | 1.00  |
|            | CX-SCA | 96.70 | 92.94 | 88.53 | 92.73   | 4.09  |
|            | CX+SCA | 89.50 | 91.03 | 90.24 | 90.26   | 0.77  |

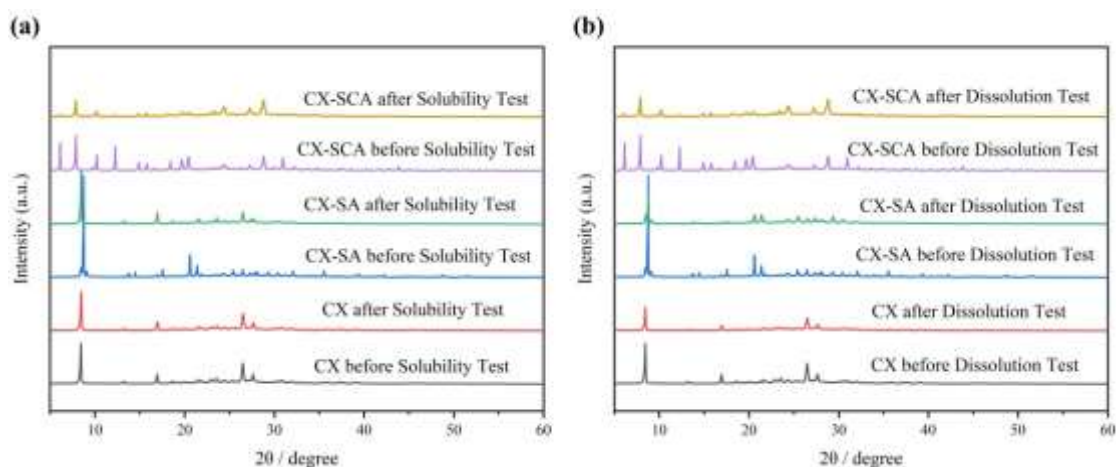

**Fig. S6** (a) PXRD patterns of CX and two cocrystals before and after solubility test. (b) PXRD patterns of CX and two cocrystals before and after dissolution test.

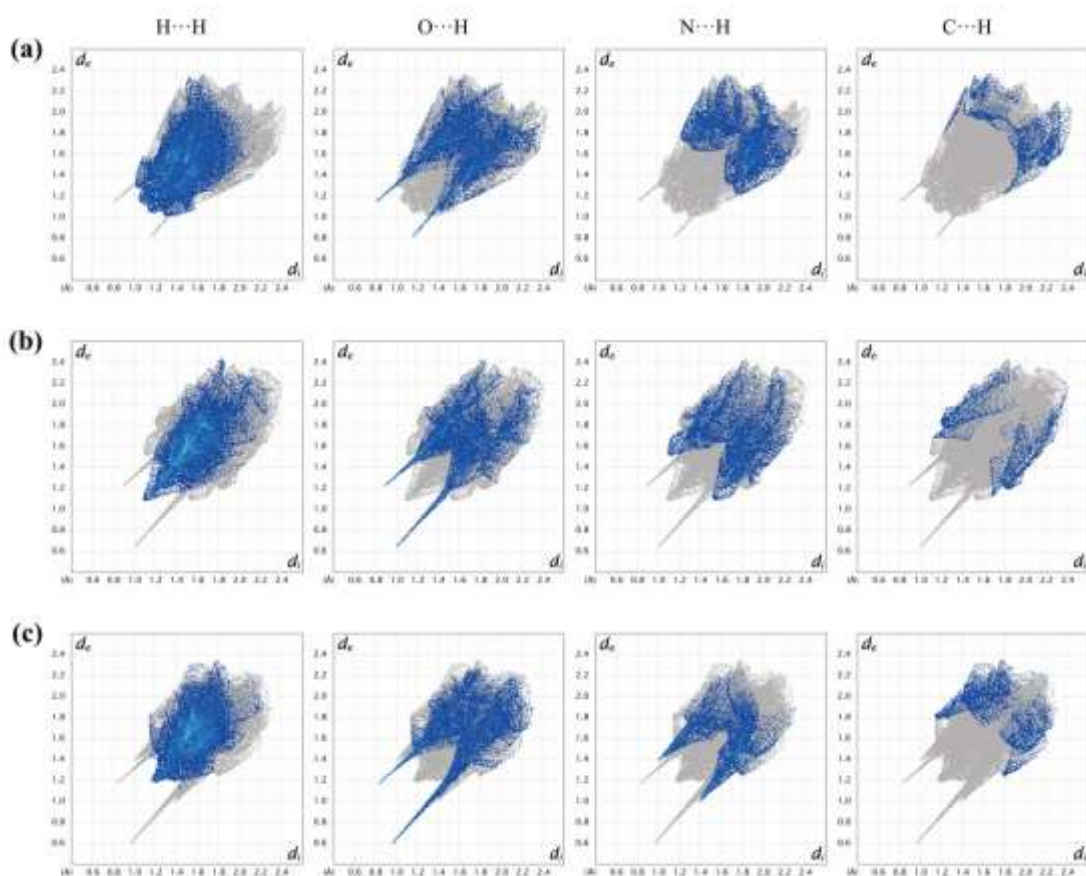

**Fig. S7** Detailed two-dimensional fingerprint plots (a) CX. (b) CX-SA cocrystal. (c) CX-SCA cocrystal.
